# Supplementary material for: Signal-noise metrics for RNA binding protein identification reveal broad spectrum protein-RNA interaction frequencies and dynamics
Source: PubMed Central journal article supplement (PMC10514315; doi:10.1038/s41467-023-41284-9), 2023-09-21
Supplement: 41467_2023_41284_MOESM4_ESM.pdf [file 41467_2023_41284_MOESM4_ESM.pdf]

**Title: Supplementary Data 1**

**Description:** Western blot conditions and protein target information.

**Title: Supplementary Data 2**

**Description:** Summary of statistical tests used for identification of UV-enriched\* protein IDs in LEAP-RBP fractions by SILAC LC-MS/MS analysis.

**Title: Supplementary Data 3**

**Description:** Complete MS dataset for SILAC LC-MS/MS analysis of LEAP-RBP fractions.

**Title: Supplementary Data 4**

**Description:** Summary of statistical tests used for identification of UV-enriched\* protein IDs in INP fractions by SILAC LC-MS/MS analysis.

**Title: Supplementary Data 5**

**Description:** Complete MS dataset for SILAC LC-MS/MS analysis of INP fractions.

**Title: Supplementary Data 6**

**Description:** Primary UniProt ID formatting and sources for referenced MS datasets.

**Title: Supplementary Data 7**

**Description:** Category and GO terms.

**Title: Supplementary Data 8**

**Description:** Complete MS dataset for LC-MS/MS analysis of input samples during the comparative LEAP-RBP experiment. Includes a summary of the statistical tests used for the identification of proteins displaying a significant difference in total abundance in response to harringtonine treatment.

**Title: Supplementary Data 9**

**Description:** Complete MS dataset for LC-MS/MS analysis of clRNP fractions during the comparative LEAP-RBP experiment. Includes a summary of the statistical tests used for the identification of proteins displaying a significant difference in RNA-bound abundance in response to harringtonine treatment.

**Title: Supplementary Data 10**

**Description:** Complete MS dataset for referenced XRNAX study (Trendel, 2019).

**Title: Supplementary Data 11**

**Description:** Complete MS dataset for referenced OOPs study (Hoefig, 2021).

**Title: Supplementary Data 12**

**Description:** Complete MS dataset for referenced Ptex study, 1.5 J/cm<sup>2</sup> (Urdaneta, 2019).

**Title: Supplementary Data 13**

**Description:** Complete MS dataset for referenced TRAPP study, 1,360 mJ/cm<sup>2</sup> (Shchepachev, 2019).

**Title: Supplementary Data 14**

**Description:** Complete MS dataset for referenced RIC study (Perez-Perri, 2018).

**Title: Supplementary Data 15**

**Description:** Complete MS dataset for referenced eRIC study (Perez-Perri, 2018).

**Title: Supplementary Data 16**

**Description:** Complete MS dataset for referenced TRAPP study, 400 mJ/cm<sup>2</sup> (Shchepachev, 2019).

**Title: Supplementary Data 17**

**Description:** Complete MS dataset for referenced TRAPP study, 800 mJ/cm<sup>2</sup> (Shchepachev, 2019).

**Title: Supplementary Data 18**

**Description:** Complete MS dataset for referenced Ptex study, 0.15 J/cm<sup>2</sup> (Urdaneta, 2019).

**Title: Supplementary Data 19**

**Description:** Complete MS dataset for referenced Ptex study, 0.015 J/cm<sup>2</sup> (Urdaneta, 2019).

**Title: Supplementary Data 20**

**Description:** Complete MS dataset for referenced OOPs study, LFQ (Hoefig, 2021).
